# Supplementary material for: Oxygen-isotope evidence from ancient zircons for liquid water at the Earth's surface 4,300 Myr ago
Source: Springer Nature journal article supplement (doi:10.1038/35051557), 2001-01-01
Supplement: 41586_2001_BF35051557_MOESM1_ESM.pdf [file 41586_2001_BF35051557_MOESM1_ESM.pdf]

Supplementary Information for Mozjisis et al.

“Oxygen-isotope evidence from ancient zircons for liquid water at the Earth’s surface 4300 Myr ago”

Each of the following tables is dedicated either to a standard (e.g. 91500 or kim5) or a data point (e.g., cf01\_95\_1). The name of this table means that it was a zircon from mount cf01, number 95 and the first spot analyzed for oxygen. Every oxygen data point reported in our paper is a duplicate measurement of the same spot.

| d18O   | stdev  | total stdev | variance | 1/variance  | d18O/var  | chi      |
|--------|--------|-------------|----------|-------------|-----------|----------|
| 5.838  | 0.1372 | 0.1372      | 0.018824 | 53.12412345 | 310.1386  | 0.000248 |
| 5.832  | 0.183  | 0.183       | 0.033489 | 29.86055123 | 174.1467  | 0.000441 |
| 5.8350 |        |             |          | 0.012050418 | wmean     | mstd     |
| 0.004  |        |             | w_stderr | 0.109774395 | 5.835841  | 0.000688 |
|        |        |             |          |             | total 2 s |          |
|        |        |             |          |             | 0.000506  |          |

cf01\_12\_1 7.275841 value after correction for isotopic fractionation by the standards  
 first spot analysis for oxygen isotopes, 2 measurements on the same spot

| d18O   | stdev   | total stdev | variance | 1/variance  | d18O/var  | chi      |
|--------|---------|-------------|----------|-------------|-----------|----------|
| 5.623  | 0.1291  | 0.1291      | 0.016667 | 59.999484   | 337.3771  | 1.625288 |
| 5.364  | 0.09778 | 0.09778     | 0.009561 | 104.5923532 | 561.0334  | 0.932348 |
| 5.501  | 0.1296  | 0.1296      | 0.016796 | 59.53741808 | 327.5153  | 0.107972 |
| 5.678  | 0.112   | 0.112       | 0.012544 | 79.71938776 | 452.6467  | 3.843891 |
| 5.4935 |         |             |          | 0.006075635 | wmean     | mstd     |
| 0.183  |         |             | w_stderr | 0.077946363 | 5.458415  | 0.852545 |
|        |         |             |          |             | total 2 s |          |
|        |         |             |          |             | 0.155893  |          |

cf01\_12\_2 6.898415 value after correction for isotopic fractionation by the standards  
second oxygen isotope analysis on grain JH992\_12, duplicated four times on the same sp

| d18O   | stdev  | total stdev | variance | 1/variance  | d18O/var  | chi      |
|--------|--------|-------------|----------|-------------|-----------|----------|
| 7.149  | 0.1044 | 0.1044      | 0.010899 | 91.74850633 | 655.9101  | 0.629206 |
| 6.758  | 0.2014 | 0.2014      | 0.040562 | 24.653641   | 166.6093  | 2.341589 |
| 6.993  | 0.1155 | 0.1155      | 0.01334  | 74.96111392 | 524.2031  | 0.401521 |
| 6.9535 |        |             |          | 0.008590907 | wmean     | mstd     |
| 0.276  |        |             | w_stderr | 0.092687145 | 7.066187  | 0.990265 |
|        |        |             |          |             | total 2 s |          |
|        |        |             |          |             | 0.185374  |          |

cf01\_12\_3 8.506187 value after correction for isotopic fractionation by the standards  
third oxygen isotope analysis on JH992\_12, duplicated 3 times on the same spot

| d18O   | stdev   | total stdev | variance | 1/variance  | d18O/var  | chi      |
|--------|---------|-------------|----------|-------------|-----------|----------|
| 8.388  | 0.1136  | 0.1136      | 0.012905 | 77.4895854  | 649.9826  | 1.254838 |
| 8.061  | 0.1128  | 0.1128      | 0.012724 | 78.59262613 | 633.5352  | 16.21734 |
| 8.618  | 0.09447 | 0.09447     | 0.008925 | 112.0500796 | 965.6476  | 1.182879 |
| 8.9    | 0.1063  | 0.1063      | 0.0113   | 88.49800304 | 787.6322  | 13.1003  |
| 8.4918 |         |             |          | 0.002804024 | wmean     | mstd     |
| 0.178  |         |             | w_stderr | 0.052953038 | 8.515254  | 10.58512 |
|        |         |             |          |             | total 2 s |          |
|        |         |             |          |             | 0.344563  |          |

cf01\_42\_1 9.955254 value after correction for isotopic fractionation by the standards  
first measurement of JH992\_42 duplicated 4 times on the same spot

| d18O   | stdev   | total stdev | variance | 1/variance  | d18O/var  | chi      |
|--------|---------|-------------|----------|-------------|-----------|----------|
| 7.692  | 0.1793  | 0.1793      | 0.032148 | 31.10566002 | 239.2647  | 0.550137 |
| 7.596  | 0.07981 | 0.07981     | 0.00637  | 156.9948399 | 1192.533  | 0.214798 |
| 7.691  | 0.1827  | 0.1827      | 0.033379 | 29.95869595 | 230.4123  | 0.521913 |
| 7.617  | 0.1412  | 0.1412      | 0.019937 | 50.15689075 | 382.045   | 0.168664 |
| 7.463  | 0.115   | 0.115       | 0.013225 | 75.61436673 | 564.31    | 0.697022 |
| 7.142  | 0.209   | 0.209       | 0.043681 | 22.89324878 | 163.5036  | 3.981095 |
| 7.5335 |         |             |          | 0.002726849 | wmean     | mstd     |
| 0.042  |         |             | w_stderr | 0.052219236 | 7.559011  | 1.226726 |
|        |         |             |          |             | total 2 s |          |
|        |         |             |          |             | 0.115674  |          |

cf01\_42\_2 8.999011 value after correction for isotopic fractionation by the standards  
second measurement of oxygen isotope value duplicated 6 times on the same spot

| d18O   | stdev  | total stdev | variance | 1/variance  | d18O/var  | chi      |
|--------|--------|-------------|----------|-------------|-----------|----------|
| 7.747  | 0.1098 | 0.1098      | 0.012056 | 82.94597563 | 642.5825  | 0.712378 |
| 7.558  | 0.1158 | 0.1158      | 0.01341  | 74.57321748 | 563.6244  | 0.691943 |
| 7.719  | 0.2913 | 0.2913      | 0.084856 | 11.78471355 | 90.9662   | 0.049292 |
| 8.025  | 0.2293 | 0.2293      | 0.052578 | 19.01918446 | 152.629   | 2.61322  |
| 7.578  | 0.1925 | 0.1925      | 0.037056 | 26.98600101 | 204.4999  | 0.157212 |
| 7.16   | 0.2811 | 0.2811      | 0.079017 | 12.65547088 | 90.61317  | 3.092469 |
| 7.6312 |        |             |          | 0.004386647 | wmean     | mstd     |
| 0.116  |        |             | w_stderr | 0.066231765 | 7.654326  | 1.219419 |
|        |        |             |          |             | total 2 s |          |
|        |        |             |          |             | 0.146276  |          |

cf01\_42\_3 9.094326 value after correction for isotopic fractionation by the standards  
third measurement of oxygen isotopic value duplicated 6 times on the same spot

| d18O    | stdev  | total stdev | variance | 1/variance  | d18O/var  | chi      |
|---------|--------|-------------|----------|-------------|-----------|----------|
| 13.285  | 0.1104 | 0.1104      | 0.012188 | 82.0468389  | 1089.992  | 8.101599 |
| 13.525  | 0.1462 | 0.1462      | 0.021374 | 46.78485144 | 632.7651  | 0.257823 |
| 13.815  | 0.2017 | 0.2017      | 0.040683 | 24.58035798 | 339.5776  | 1.144328 |
| 13.935  | 0.1184 | 0.1184      | 0.014019 | 71.33400292 | 994.0393  | 8.042067 |
| 13.6400 |        |             |          | 0.004449466 | wmean     | mstd     |
| 0.146   |        |             | w_stderr | 0.066704321 | 13.59923  | 8.772908 |
|         |        |             |          |             | total 2 s |          |
|         |        |             |          |             | 0.395144  |          |

cf01\_42\_4 15.03923 value after correction for isotopic fractionation by the standards  
fourth measurement of oxygen isotope value measured on the same spot and duplicated 4



| d18O   | stdev   | total stdev | variance | 1/variance  | d18O/var  | chi      |
|--------|---------|-------------|----------|-------------|-----------|----------|
| 6.31   | 0.144   | 0.144       | 0.020736 | 48.22530864 | 304.3017  | 0.295905 |
| 6.403  | 0.07756 | 0.07756     | 0.006016 | 166.2357393 | 1064.407  | 4.87979  |
| 6.439  | 0.2465  | 0.2465      | 0.060762 | 16.45758674 | 105.9704  | 0.707455 |
| 5.991  | 0.2506  | 0.2506      | 0.0628   | 15.9234756  | 95.39754  | 0.922305 |
| 5.74   | 0.1256  | 0.1256      | 0.015775 | 63.38999554 | 363.8586  | 15.32374 |
| 6.218  | 0.1426  | 0.1426      | 0.020335 | 49.17687743 | 305.7818  | 0.009187 |
| 6.1835 |         |             |          | 0.002782346 | wmean     | mswd     |
| 0.110  |         |             | w_stderr | 0.052747944 | 6.231668  | 4.427676 |
|        |         |             |          |             | total 2 s |          |
|        |         |             |          |             | 0.221985  |          |

cf01\_48\_1 7.671668 value after correction for isotopic fractionation by the standards  
first measurement of oxygen isotope value of the same spot duplicated 6 times

| d18O   | stdev  | total stdev | variance | 1/variance  | d18O/var  | chi      |
|--------|--------|-------------|----------|-------------|-----------|----------|
| 7.349  | 0.4887 | 0.4887      | 0.238828 | 4.187119174 | 30.77114  | 5.900855 |
| 6.725  | 0.2773 | 0.2773      | 0.076895 | 13.00469769 | 87.45659  | 4.124051 |
| 5.998  | 0.2003 | 0.2003      | 0.04012  | 24.92516841 | 149.5012  | 0.669291 |
| 5.355  | 0.3135 | 0.3135      | 0.098282 | 10.17477724 | 54.48593  | 6.62411  |
| 6.3568 |        |             |          | 0.019123471 | wmean     | mstd     |
| 0.866  |        |             | w_stderr | 0.138287638 | 6.161866  | 5.772769 |
|        |        |             |          |             | total 2 s |          |
|        |        |             |          |             | 0.664516  |          |

cf01\_48\_2 7.601866 value after correction for isotopic fractionation by the standards  
second measurment of the oxygen isotope value for the same spot duplicated 4 times

| d18O   | stdev  | total stdev | variance | 1/variance  | d18O/var  | chi      |
|--------|--------|-------------|----------|-------------|-----------|----------|
| 5.683  | 0.1859 | 0.1859      | 0.034559 | 28.93618154 | 164.4443  | 0.403356 |
| 5.559  | 0.0664 | 0.0664      | 0.004409 | 226.8108579 | 1260.842  | 0.007987 |
| 5.515  | 0.1553 | 0.1553      | 0.024118 | 41.46265314 | 228.6665  | 0.103384 |
| 5.5857 |        |             |          | 0.003364628 | wmean     | mstd     |
| 0.062  |        |             | w_stderr | 0.058005412 | 5.564934  | 0.257364 |
|        |        |             |          |             | total 2 s |          |
|        |        |             |          |             | 0.058854  |          |

cf01\_76\_1 6.594934 value after correction for isotopic fractionation by the standards  
first measurement of the oxygen isotope value for the same spot duplicated 3 times

| d18O   | stdev  | total stdev | variance | 1/variance  | d18O/var  | chi      |
|--------|--------|-------------|----------|-------------|-----------|----------|
| 5.513  | 0.1448 | 0.1448      | 0.020967 | 47.69390434 | 262.9365  | 15.49031 |
| 4.598  | 0.1098 | 0.1098      | 0.012056 | 82.94597563 | 381.3856  | 9.878374 |
| 4.993  | 0.1859 | 0.1859      | 0.034559 | 28.93618154 | 144.4784  | 0.072051 |
| 5.0347 |        |             |          | 0.006266604 | wmean     | mstd     |
| 0.265  |        |             | w_stderr | 0.079161885 | 4.9431    | 25.44073 |
|        |        |             |          |             | total 2 s |          |
|        |        |             |          |             | 0.798566  |          |

cf01\_76\_2      5.9731 value after correction for isotopic fractionation by the standards  
second measurment of the oxygen isotope value for the same spot duplicated 3 times

| d18O   | stdev  | total stdev | variance | 1/variance  | d18O/var  | chi      |
|--------|--------|-------------|----------|-------------|-----------|----------|
| 4.846  | 0.1145 | 0.1145      | 0.01311  | 76.27619611 | 369.6344  | 18.606   |
| 3.917  | 0.1131 | 0.1131      | 0.012792 | 78.17624208 | 306.2163  | 14.80025 |
| 4.288  | 0.1324 | 0.1324      | 0.01753  | 57.04584661 | 244.6126  | 0.234449 |
| 4.3503 |        |             |          | 0.004728171 | wmean     | mstd     |
| 0.270  |        |             | w_stderr | 0.068761695 | 4.352108  | 16.82035 |
|        |        |             |          |             | total 2 s |          |
|        |        |             |          |             | 0.564019  |          |

cf01\_76\_3 5.382108 value after correction for isotopic fractionation by the standards  
third measurement of the oxygen isotope value of the same spot duplicated 3 times

| d18O   | stdev  | total stdev | variance | 1/variance  | d18O/var  | chi      |
|--------|--------|-------------|----------|-------------|-----------|----------|
| 5.37   | 0.1095 | 0.1095      | 0.01199  | 83.40109672 | 447.8639  | 22.05328 |
| 4.743  | 0.118  | 0.118       | 0.013924 | 71.81844298 | 340.6349  | 0.913449 |
| 4.521  | 0.0981 | 0.0981      | 0.009624 | 103.9111103 | 469.7821  | 11.64597 |
| 4.8780 |        |             |          | 0.003859057 | wmean     | mstd     |
| 0.254  |        |             | w_stderr | 0.06212131  | 4.855778  | 34.6127  |
|        |        |             |          |             | total 2 s |          |
|        |        |             |          |             | 0.730951  |          |

cf01\_88\_1 5.885778 value after correction for isotopic fractionation by the standards  
first measurement on spot 1 duplicated 3 times

| d18O   | stdev   | total stdev | variance | 1/variance  | d18O/var  | chi      |
|--------|---------|-------------|----------|-------------|-----------|----------|
| 5.625  | 0.1265  | 0.1265      | 0.016002 | 62.49121217 | 351.5131  | 8.846667 |
| 5.37   | 0.1095  | 0.1095      | 0.01199  | 83.40109672 | 447.8639  | 1.226194 |
| 5.379  | 0.06939 | 0.06939     | 0.004815 | 207.6855232 | 1117.14   | 3.523579 |
| 4.893  | 0.07657 | 0.07657     | 0.005863 | 170.5621673 | 834.5607  | 21.58561 |
| 5.3168 |         |             |          | 0.001907887 | wmean     | mstd     |
| 0.153  |         |             | w_stderr | 0.043679368 | 5.248747  | 17.59103 |
|        |         |             |          |             | total 2 s |          |
|        |         |             |          |             | 0.366397  |          |

cf01\_88\_3 6.278747 value after correction for isotopic fractionation by the standards

ALSO:

d18O 1 s.e location

5.625 0.1265 spot4

NOTE: THIS WAS ADDED TO ABOVE DATA SET

measurement was duplicated for the same spot a total of 4 times

| d18O   | stdev   | total stdev | variance | 1/variance  | d18O/var  | chi      |
|--------|---------|-------------|----------|-------------|-----------|----------|
| 5.568  | 0.1426  | 0.1426      | 0.020335 | 49.17687743 | 273.8169  | 22.98351 |
| 5.57   | 0.1685  | 0.1685      | 0.028392 | 35.22087894 | 196.1803  | 16.55743 |
| 4.434  | 0.1154  | 0.1154      | 0.013317 | 75.09108549 | 332.9539  | 15.23026 |
| 4.354  | 0.1393  | 0.1393      | 0.019404 | 51.53446445 | 224.3811  | 14.49568 |
| 4.951  | 0.08152 | 0.08152     | 0.006646 | 150.4775314 | 745.0143  | 0.668262 |
| 4.794  | 0.1166  | 0.1166      | 0.013596 | 73.55342479 | 352.6151  | 0.600553 |
| 4.9452 |         |             |          | 0.002298564 | wmean     | mstd     |
| 0.217  |         |             | w_stderr | 0.04794334  | 4.88436   | 14.10714 |
|        |         |             |          |             | total 2 s |          |
|        |         |             |          |             | 0.360145  |          |

cf01\_90\_1 5.91436 value after correction for isotopic fractionation by the standards  
duplicate measurments of spot 1 repeated 6 times



| d18O   | stdev   | total stdev | variance | 1/variance  | d18O/var  | chi      |
|--------|---------|-------------|----------|-------------|-----------|----------|
| 5.324  | 0.1231  | 0.1231      | 0.015154 | 65.9908761  | 351.3354  | 0.236318 |
| 5.483  | 0.08364 | 0.08364     | 0.006996 | 142.9459817 | 783.7728  | 6.845948 |
| 5.106  | 0.1127  | 0.1127      | 0.012701 | 78.73216028 | 402.0064  | 1.969401 |
| 5.127  | 0.08551 | 0.08551     | 0.007312 | 136.7622342 | 701.18    | 2.572812 |
| 5.141  | 0.175   | 0.175       | 0.030625 | 32.65306122 | 167.8694  | 0.495278 |
| 5.2362 |         |             |          | 0.00218778  | wmean     | mstd     |
| 0.073  |         |             | w_stderr | 0.046773712 | 5.264158  | 4.039919 |
|        |         |             |          |             | total 2 s |          |
|        |         |             |          |             | 0.188026  |          |

cf01\_95\_1 6.294158 value after correction for isotopic fractionation by the standards  
5 duplicate measurements of spot 1

| d18O   | stdev   | total stdev | variance | 1/variance  | d18O/var  | chi      |
|--------|---------|-------------|----------|-------------|-----------|----------|
| 5.022  | 0.1209  | 0.1209      | 0.014617 | 68.41438043 | 343.577   | 17.11188 |
| 5.172  | 0.08436 | 0.08436     | 0.007117 | 140.5163492 | 726.7506  | 17.22517 |
| 5.874  | 0.06495 | 0.06495     | 0.004219 | 237.050944  | 1392.437  | 29.35135 |
| 5.3560 |         |             |          | 0.002242245 | wmean     | mstd     |
| 0.263  |         |             | w_stderr | 0.047352345 | 5.522121  | 63.6884  |
|        |         |             |          |             | total 2 s |          |
|        |         |             |          |             | 0.755791  |          |

cf01\_95\_2 6.552121 value after correction for isotopic fractionation by the standards  
3 duplicate measurements of spot 2

| d18O   | stdev  | total stdev | variance | 1/variance  | d18O/var  | chi      |
|--------|--------|-------------|----------|-------------|-----------|----------|
| 5.022  | 0.1209 | 0.1209      | 0.014617 | 68.41438043 | 343.577   | 4.645808 |
| 5.759  | 0.1302 | 0.1302      | 0.016952 | 58.98995047 | 339.7231  | 13.38877 |
| 5.14   | 0.1178 | 0.1178      | 0.013877 | 72.06251567 | 370.4013  | 1.465159 |
| 5.3070 |        |             |          | 0.005013364 | wmean     | mstd     |
| 0.229  |        |             | w_stderr | 0.070805116 | 5.28259   | 19.49974 |
|        |        |             |          |             | total 2 s |          |
|        |        |             |          |             | 0.62533   |          |

cf01\_95\_3      6.31259 value after correction for isotopic fractionation by the standards  
3 duplicate measurements of spot 3

| d18O   | stdev  | total stdev | variance | 1/variance  | d18O/var  | chi      |
|--------|--------|-------------|----------|-------------|-----------|----------|
| 8.707  | 0.2824 | 0.2824      | 0.07975  | 12.53922269 | 109.179   | 2.269093 |
| 8.985  | 0.3133 | 0.3133      | 0.098157 | 10.18777184 | 91.53713  | 5.040527 |
| 8.16   | 0.1153 | 0.1153      | 0.013294 | 75.22139537 | 613.8066  | 1.112385 |
| 8.3    | 0.2659 | 0.2659      | 0.070703 | 14.14370942 | 117.3928  | 0.004785 |
| 8.486  | 0.3291 | 0.3291      | 0.108307 | 9.233029761 | 78.35149  | 0.385726 |
| 8.23   | 0.316  | 0.316       | 0.099856 | 10.01442077 | 82.41868  | 0.026671 |
| 7.955  | 0.2935 | 0.2935      | 0.086142 | 11.60870537 | 92.34725  | 1.238322 |
| 7.969  | 0.441  | 0.441       | 0.194481 | 5.141890467 | 40.97573  | 0.50248  |
| 7.874  | 0.5615 | 0.5615      | 0.315282 | 3.171761176 | 24.97445  | 0.526966 |
| 7.59   | 0.3283 | 0.3283      | 0.107781 | 9.278082599 | 70.42065  | 4.437888 |
| 9.084  | 0.3278 | 0.3278      | 0.107453 | 9.306408281 | 84.53941  | 5.991795 |
| 7.547  | 0.21   | 0.21        | 0.0441   | 22.67573696 | 171.1338  | 12.23689 |
| 9.248  | 0.5082 | 0.5082      | 0.258267 | 3.871958364 | 35.80787  | 3.616085 |
| 9.408  | 0.5861 | 0.5861      | 0.343513 | 2.911096199 | 27.38759  | 3.693489 |
| 9.136  | 0.2186 | 0.2186      | 0.047786 | 20.92664875 | 191.1859  | 15.27621 |
| 8.164  | 0.2616 | 0.2616      | 0.068435 | 14.61249988 | 119.2964  | 0.20211  |
| 8.115  | 0.1072 | 0.1072      | 0.011492 | 87.01826687 | 706.1532  | 2.415429 |
| 8.373  | 0.1029 | 0.1029      | 0.010588 | 94.44288614 | 790.7703  | 0.78886  |
| 8.4073 |        |             |          | 0.002402082 | wmean     | mswd     |
| 0.134  |        |             | w_stderr | 0.049011041 | 8.281606  | 3.51563  |
|        |        |             |          |             | total 2 s |          |
|        |        |             |          |             |           | 0.183792 |

022500/91500\_oxy  
zircon oxygen isotope standard

| d18O   | stdev   | total stdev | variance | 1/variance  | d18O/var  | chi      |
|--------|---------|-------------|----------|-------------|-----------|----------|
| 8.132  | 0.1121  | 0.1121      | 0.012566 | 79.57722213 | 647.122   | 1.611512 |
| 8.231  | 0.0956  | 0.0956      | 0.009139 | 109.4168519 | 900.6101  | 6.371173 |
| 8.012  | 0.0866  | 0.0866      | 0.0075   | 133.341156  | 1068.329  | 0.066343 |
| 8.037  | 0.07671 | 0.07671     | 0.005884 | 169.9401646 | 1365.809  | 0.380297 |
| 7.787  | 0.1653  | 0.1653      | 0.027324 | 36.59774214 | 284.9866  | 1.503617 |
| 8.075  | 0.09098 | 0.09098     | 0.008277 | 120.8114606 | 975.5525  | 0.879153 |
| 8      | 0.05093 | 0.05093     | 0.002594 | 385.5250904 | 3084.201  | 0.040946 |
| 7.806  | 0.1926  | 0.1926      | 0.037095 | 26.95798544 | 210.434   | 0.909659 |
| 8.245  | 0.2347  | 0.2347      | 0.055084 | 18.15406227 | 149.6802  | 1.1833   |
| 8.344  | 0.1202  | 0.1202      | 0.014448 | 69.21354038 | 577.5178  | 8.688551 |
| 7.903  | 0.09388 | 0.09388     | 0.008813 | 113.4628892 | 896.6972  | 0.852776 |
| 8.334  | 0.1512  | 0.1512      | 0.022861 | 43.74177655 | 364.544   | 5.185431 |
| 8.277  | 0.1284  | 0.1284      | 0.016487 | 60.65546724 | 502.0453  | 5.00678  |
| 7.685  | 0.06768 | 0.06768     | 0.004581 | 218.3128503 | 1677.734  | 20.26786 |
| 7.782  | 0.06996 | 0.06996     | 0.004894 | 204.3150689 | 1589.98   | 8.813522 |
| 7.877  | 0.1175  | 0.1175      | 0.013806 | 72.43096424 | 570.5387  | 0.919873 |
| 8.245  | 0.1149  | 0.1149      | 0.013202 | 75.7460417  | 624.5261  | 4.937203 |
| 7.834  | 0.1824  | 0.1824      | 0.03327  | 30.05732533 | 235.4691  | 0.728611 |
| 8.0337 |         |             |          | 0.000508064 | wmean     | mstd     |
| 0.050  |         |             | w_stderr | 0.022540265 | 7.989694  | 4.556441 |
|        |         |             |          |             | total 2 s |          |
|        |         |             |          |             | 0.096228  |          |

022600/91500\_oxy

| d18O   | stdev   | total stdev | variance | 1/variance  | d18O/var  | chi      |
|--------|---------|-------------|----------|-------------|-----------|----------|
| 3.105  | 0.08416 | 0.08416     | 0.007083 | 141.1849962 | 438.3794  | 115.8791 |
| 3.588  | 0.06412 | 0.06412     | 0.004111 | 243.2276662 | 872.7009  | 43.51195 |
| 2.943  | 0.1381  | 0.1381      | 0.019072 | 52.43395812 | 154.3131  | 59.80278 |
| 4.541  | 0.1061  | 0.1061      | 0.011257 | 88.83195747 | 403.3859  | 24.9568  |
| 4.398  | 0.09056 | 0.09056     | 0.008201 | 121.9346602 | 536.2686  | 18.26595 |
| 4.449  | 0.08672 | 0.08672     | 0.00752  | 132.972386  | 591.5941  | 25.51479 |
| 2.861  | 0.2874  | 0.2874      | 0.082599 | 12.10671928 | 34.63732  | 16.00998 |
| 2.978  | 0.3547  | 0.3547      | 0.125812 | 7.948361719 | 23.67022  | 8.480928 |
| 3.935  | 0.1324  | 0.1324      | 0.01753  | 57.04584661 | 224.4754  | 0.329137 |
| 4.609  | 0.3963  | 0.3963      | 0.157054 | 6.367249315 | 29.34665  | 2.27727  |
| 2.766  | 0.4919  | 0.4919      | 0.241966 | 4.132818709 | 11.43138  | 6.405545 |
| 3.423  | 0.1872  | 0.1872      | 0.035044 | 28.53568559 | 97.67765  | 9.86465  |
| 4.846  | 0.3442  | 0.3442      | 0.118474 | 8.440696175 | 40.90361  | 5.885649 |
| 3.928  | 0.3598  | 0.3598      | 0.129456 | 7.724629921 | 30.34235  | 0.053162 |
| 4.511  | 0.09964 | 0.09964     | 0.009928 | 100.7239067 | 454.3655  | 25.18516 |
| 4.37   | 0.1104  | 0.1104      | 0.012188 | 82.0468389  | 358.5447  | 10.57672 |
| 4.373  | 0.08258 | 0.08258     | 0.006819 | 146.6392541 | 641.2535  | 19.2206  |
| 4.35   | 0.09263 | 0.09263     | 0.00858  | 116.545812  | 506.9743  | 13.39684 |
| 3.8874 |         |             |          | 0.00073592  | wmean     | mstd     |
| 0.166  |         |             | w_stderr | 0.027127845 | 4.010959  | 23.85982 |
|        |         |             |          |             | total 2 s |          |
|        |         |             |          |             | 0.26502   |          |

022500/kim5\_oxy  
zircon oxygen isotope standard

| d18O   | stdev   | total stdev | variance | 1/variance  | d18O/var  | chi      |
|--------|---------|-------------|----------|-------------|-----------|----------|
| 3.965  | 0.1546  | 0.1546      | 0.023901 | 41.83897351 | 165.8915  | 5.647734 |
| 3.457  | 0.07063 | 0.07063     | 0.004989 | 200.4571666 | 692.9804  | 3.962355 |
| 2.948  | 0.1207  | 0.1207      | 0.014568 | 68.64129364 | 202.3545  | 28.9647  |
| 3.615  | 0.1455  | 0.1455      | 0.02117  | 47.23609783 | 170.7585  | 0.014312 |
| 3.879  | 0.173   | 0.173       | 0.029929 | 33.41240937 | 129.6067  | 2.645912 |
| 3.286  | 0.07151 | 0.07151     | 0.005114 | 195.553883  | 642.5901  | 18.98645 |
| 3.388  | 0.09741 | 0.09741     | 0.009489 | 105.3884248 | 357.056   | 4.629663 |
| 4.137  | 0.08901 | 0.08901     | 0.007923 | 126.2183208 | 522.1652  | 36.72438 |
| 3.548  | 0.2018  | 0.2018      | 0.040723 | 24.55600291 | 87.1247   | 0.060396 |
| 3.541  | 0.08493 | 0.08493     | 0.007213 | 138.636553  | 490.912   | 0.444032 |
| 3.687  | 0.1275  | 0.1275      | 0.016256 | 61.514802   | 226.8051  | 0.491718 |
| 3.534  | 0.1287  | 0.1287      | 0.016564 | 60.37302075 | 213.3583  | 0.244158 |
| 3.786  | 0.08119 | 0.08119     | 0.006592 | 151.7032613 | 574.3485  | 5.385    |
| 3.744  | 0.07068 | 0.07068     | 0.004996 | 200.1736546 | 749.4502  | 4.290683 |
| 3.762  | 0.1189  | 0.1189      | 0.014137 | 70.73531482 | 266.1063  | 1.911935 |
| 3.6185 |         |             |          | 0.000655119 | wmean     | mstd     |
| 0.075  |         |             | w_stderr | 0.025595301 | 3.597594  | 8.171673 |
|        |         |             |          |             | total 2 s |          |
|        |         |             |          |             | 0.146334  |          |

022600/kim5\_oxy
